# Supplementary material
Source: PubMed Central journal article supplement (PMC5779614)
Supplement: NIHMS75654-supplement-Supplementary.pdf [file NIHMS75654-supplement-Supplementary.pdf]

# Circulating nucleic acids damage DNA of healthy cells by integrating into their genomes

INDRANEEL MITTRA, NAVEEN KUMAR KHARE, GORANTLA VENKATA RAGHURAM, ROHAN CHAUBAL, FATEMA KHAMBATTI, DEEPIKA GUPTA, ASHWINI GAIKWAD, PREETI PRASANNAN, AKSHITA SINGH, AISHWARYA IYER, ANKITA SINGH, PAWAN UPADHYAY, NAVEEN KUMAR NAIR, PRADYUMNA KUMAR MISHRA and AMIT DUTT

*J. Biosci.* 40(1), March 2015, 91–111, © Indian Academy of Sciences  
Supplementary material

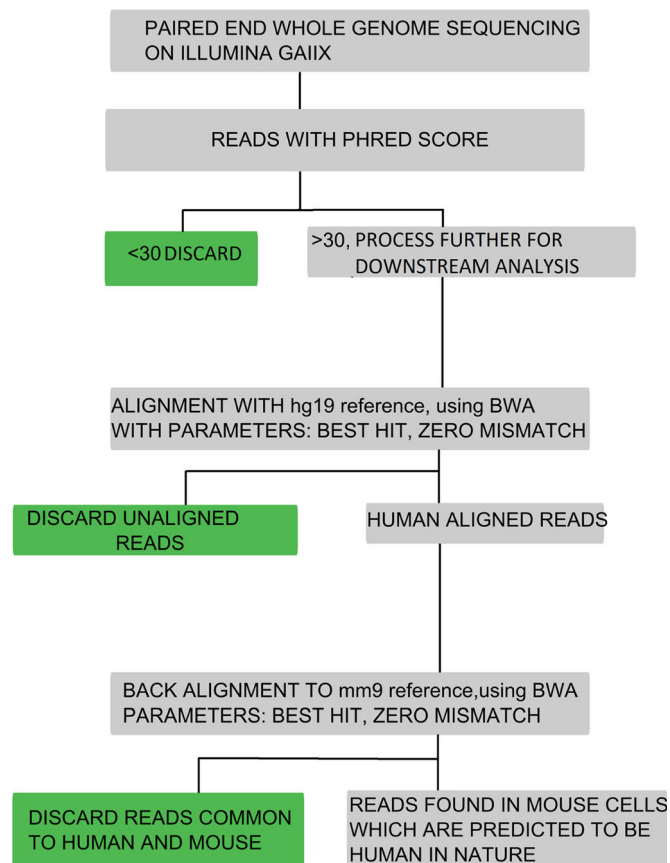

**Supplementary figure 1.** Subtractive computational algorithm to detect human genomic sequences from DNafs- and Cfs-derived mouse cell clones.

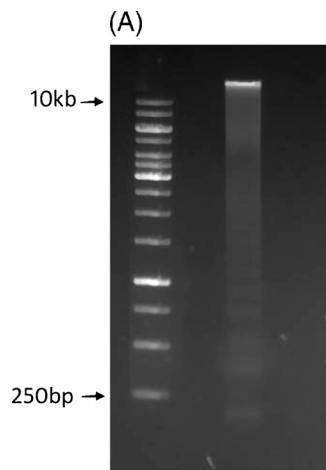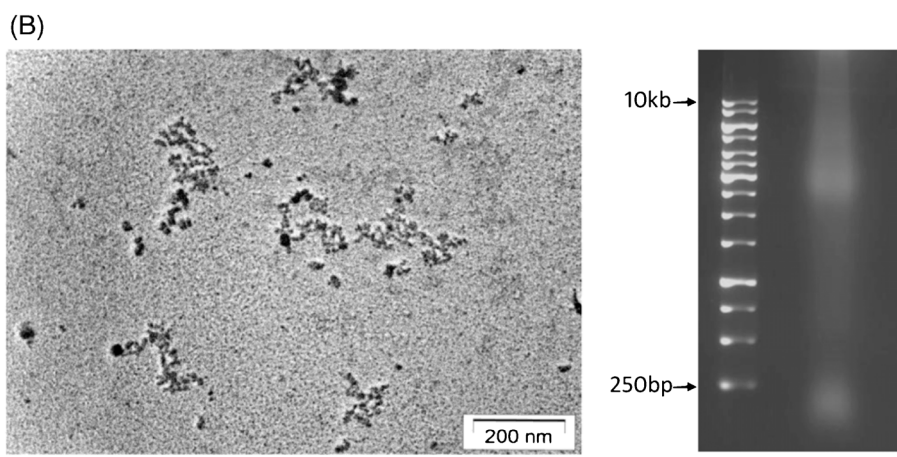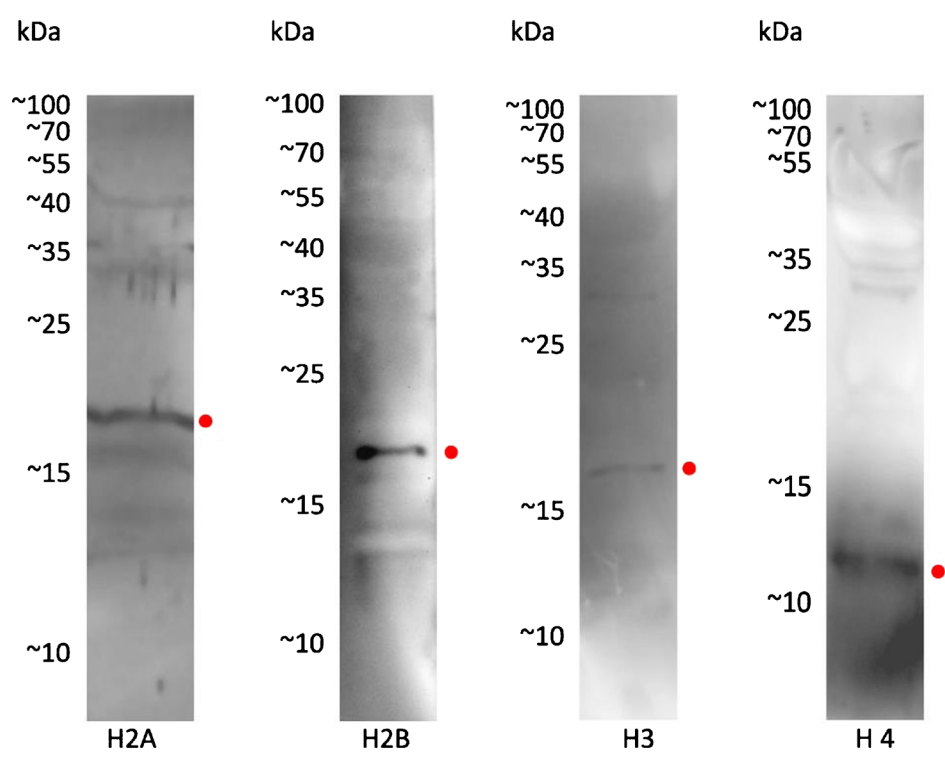

◀ **Supplementary figure 2.** Characteristic features of DNAs and Cfs isolated from plasma and serum respectively. **(A)** Agarose gel electrophoresis of DNAs (150 ng) isolated from plasma showing extensive size heterogeneity of DNA fragments with a suggestive ladder pattern. **(B)** Characteristic features of Cfs. Electron micrographs of Cfs showing typical beads-on-a-string appearance of chromatin of disparate sizes (upper left-hand panel). Agarose gel electrophoresis of DNA (150 ng) contained in Cfs showing extensive size heterogeneity of DNA fragments (upper right-hand panel). Western blot analysis using polyclonal antibodies against various histones showing presence of histone proteins in Cfs isolated from serum (lower panel). The H1 protein was not detectable in Cfs.

(A)

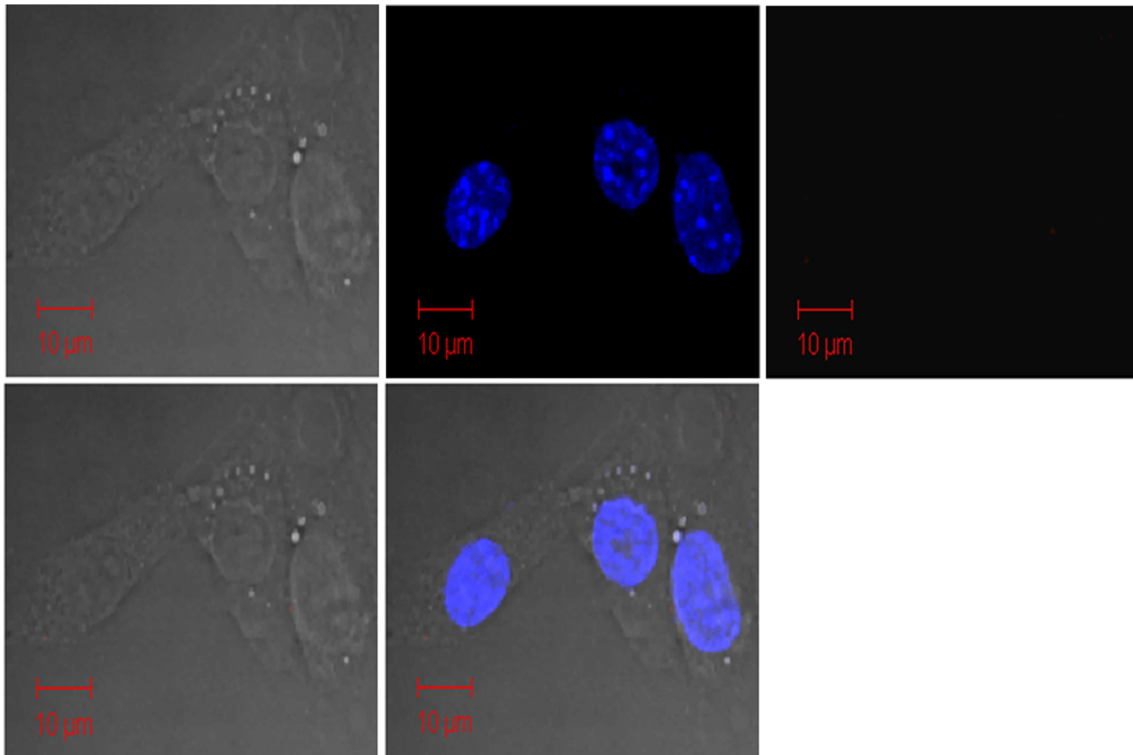

(B)

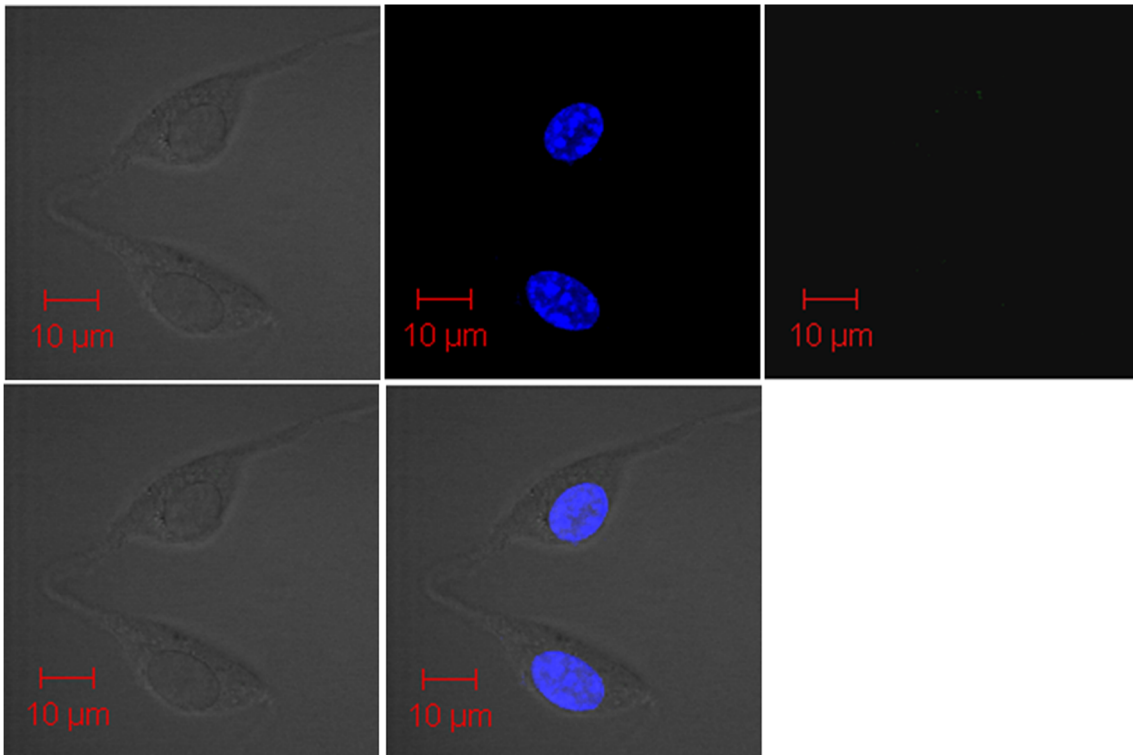

(C)

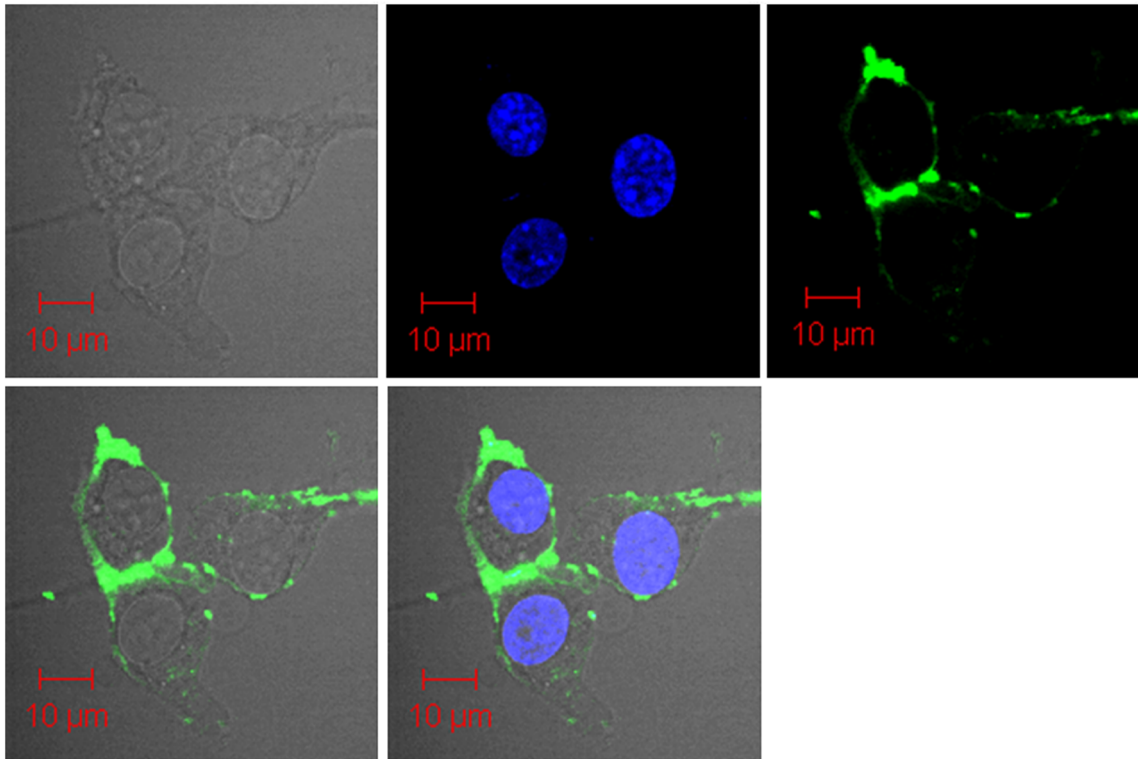

(D)

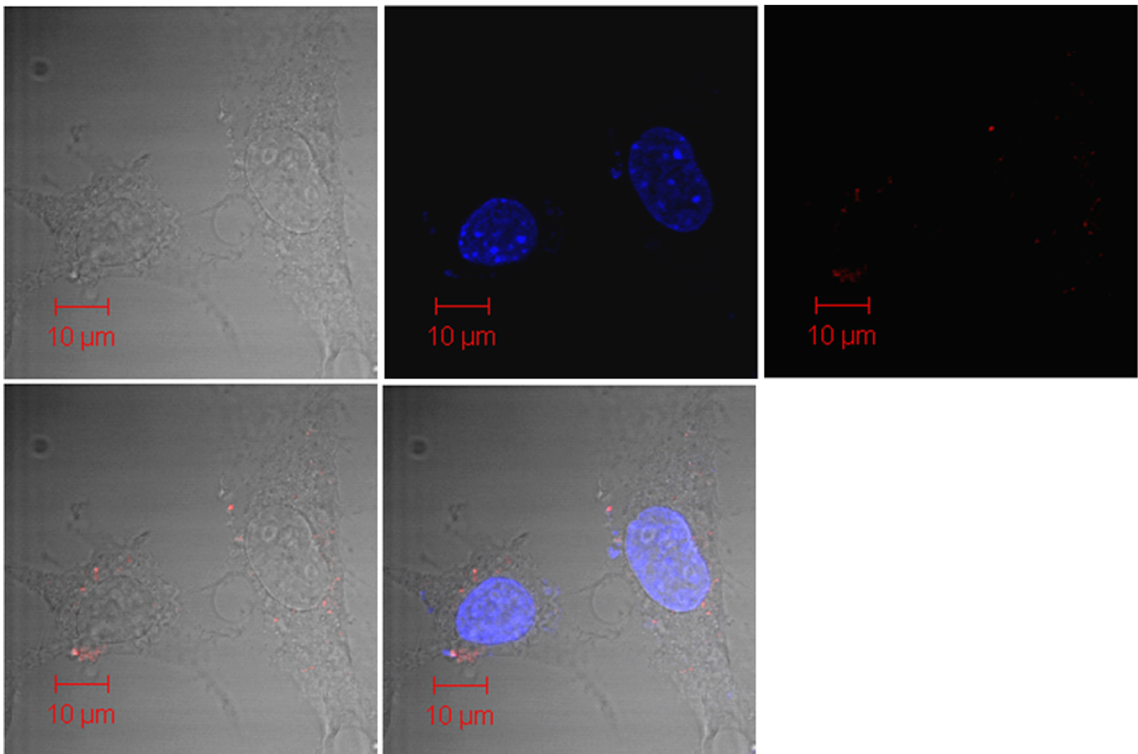

(E)

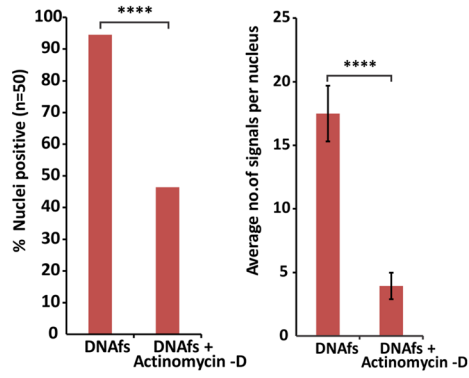

(G)

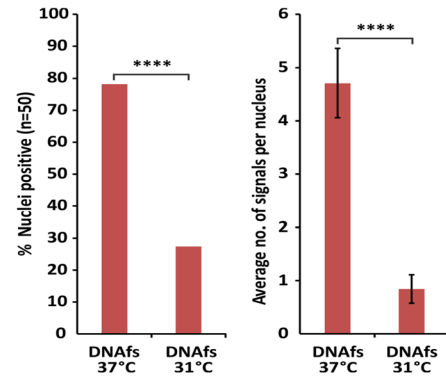

(F)

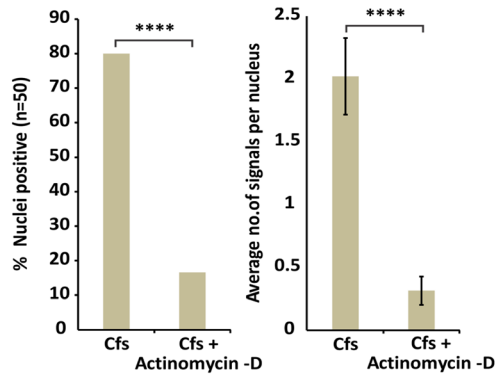

(H)

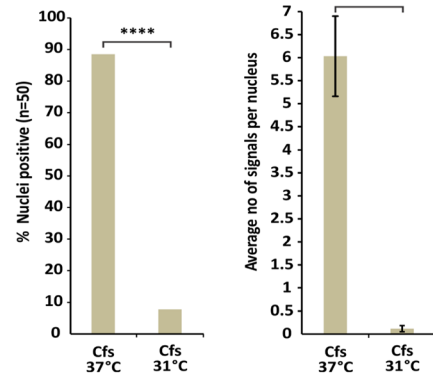

(I)

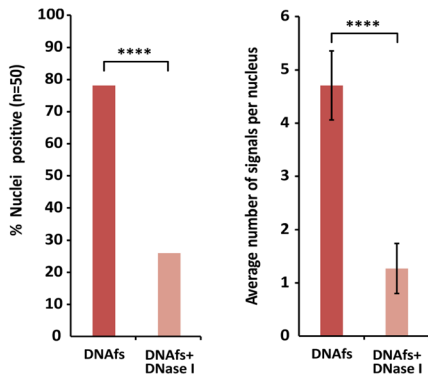

(J)

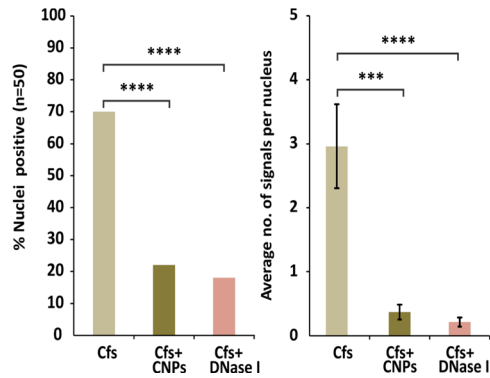

◀ **Supplementary figure 3.** Negative control experiments and those using specific inhibitors with respect to nuclear uptake and chromosomal association of DNAs and Cfs. (A) Nuclear uptake of labelled RNA. Semi-confluent NIH3T3 cells were treated for 6 h with Cy3-labelled RNA (10ng) purified from pooled plasma samples from cancer patients. Intracellular fate of labelled RNA was analysed by LSCM. A few low-intensity fluorescent signals are observed in the cytoplasm but not in the nuclei. (B) Nuclear uptake of labelled proteins. Cells plated as above were treated for 6 h with ATTO-TEC (green) labelled  $\alpha$ -lactalbumin (10 ng). Intracellular fate of labelled protein was analysed by LSCM. None of the cells analysed (0/50) showed cytoplasmic or nuclear uptake of labelled protein. (C and D) Nuclear uptake of label alone. Cells plated as above were treated for 6 h with ATTO-TEC (green) and Platinum Bright (red) (1  $\mu$ L each) and analysed by LSCM. Both dyes, especially ATTO-TEC were seen in the cytoplasm but never in any of 50 nuclei examined. (E and F) Nuclear uptake of labelled DNAs and Cfs in presence of Actinomycin D. NIH3T3 cells ( $10 \times 10^4$ ) were treated with labeled DNAs and Cfs (5ng DNA each) for 6 h in the presence or absence of Actinomycin D (0.0005  $\mu$ g/mL); treated cells were examined under LSCM. Fifty nuclei were analysed in each case. Presence of Actinomycin D significantly reduced the number of nuclei showing positive fluorescent signals in case of both DNAs- and Cfs-treated cells (analysed by Chi-square test) as well as the average number of signals per nucleus (analysed by Student's *t*-test). (G and H) Nuclear uptake of labelled DNAs and Cfs at low temperature (31°C). Cells were plated as above and treated with labelled DNAs and Cfs (5ng DNA each) for 6 h at 31°C and 37°C; treated cells examined under LSCM. For experiments at low temperature, cells were kept at 31°C for 8 h prior to adding DNAs and Cfs. Fifty nuclei were analysed in each case. Cells grown at 31°C showed significantly reduced number of nuclei showing positive fluorescent DNAs and Cfs signals (analysed by Chi-square test) as well as the average number of signals per nucleus (analysed by Student's *t*-test) compared to those grown at 37°C. (I and J) Nuclear uptake of labelled DNAs and Cfs in presence of DNase I and/or CNPs. Cells were plated as above and treated with labelled DNAs and Cfs (5ng DNA each) for 6 h in the presence or absence of DNase I (0.05 U/mL) and/or CNPs (5  $\mu$ g H4 IgG /mL); treated cells examined under LSCM. Fifty nuclei were analysed in each case. In case of DNAs treated cells (supplementary figure 3I), DNase I treatment significantly inhibited the number of nuclei showing positive fluorescent DNAs signals (analysed by Chi-square test) as well as the average number of signals per nucleus (analysed by Student's *t*-test). With respect to Cfs (supplementary figure 3J), the number of nuclei showing positive fluorescent signals as well as the average number of signals per nucleus were inhibited by both DNase I and CNPs (analysed by Chi-square test and Student's *t*-test respectively. \* $p < 0.05$ , \*\* $p < 0.01$ , \*\*\* $p < 0.001$ , \*\*\*\* $p < 0.0001$ ).

(A)

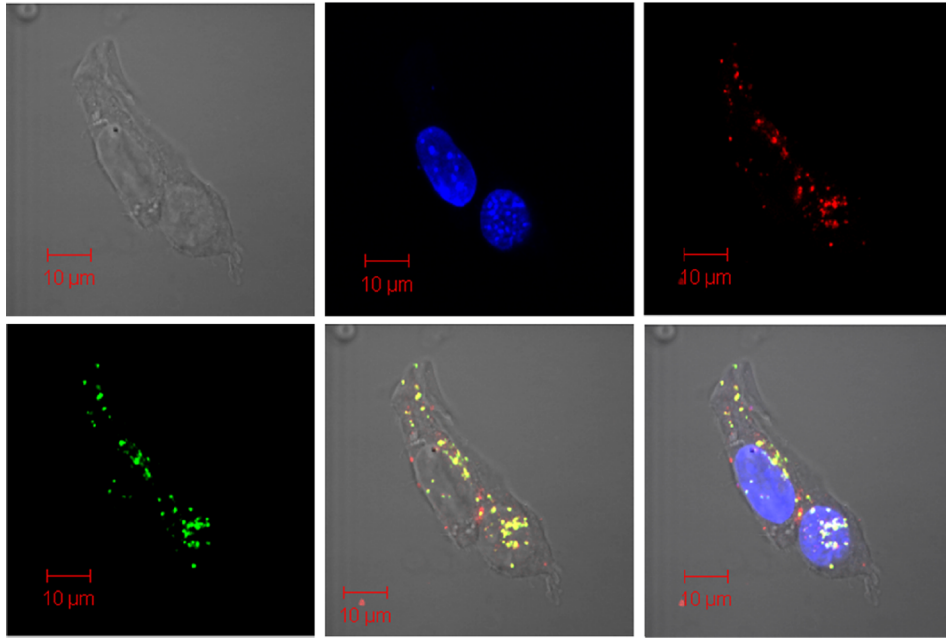

(B)

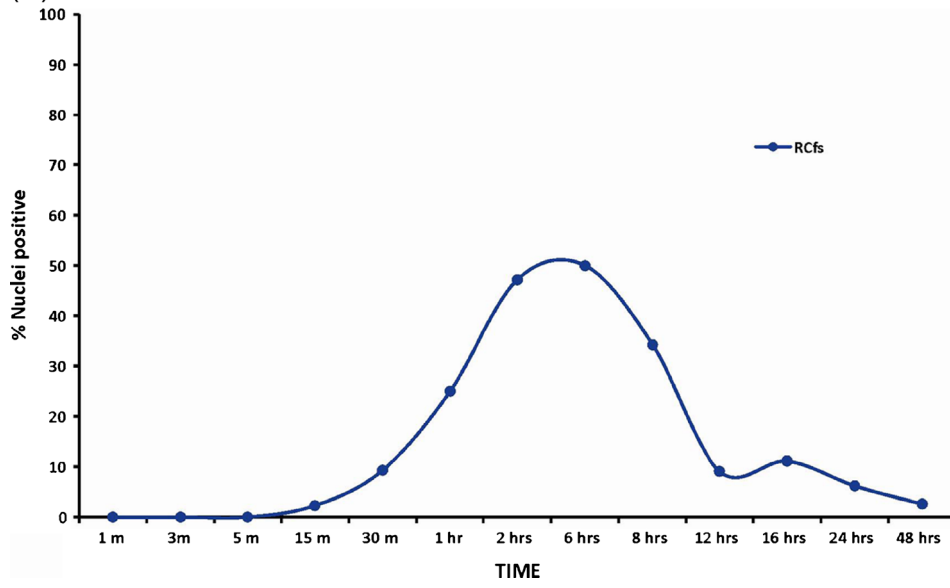



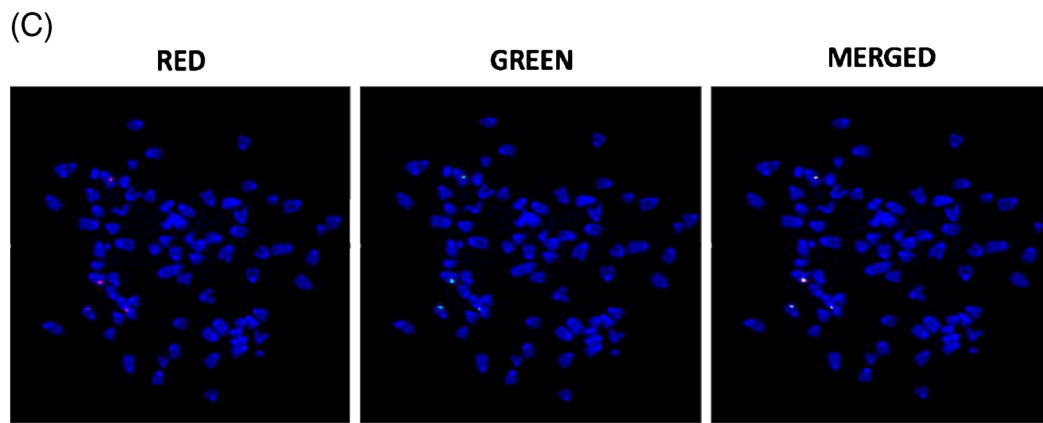

**Supplementary figure 4.** Cellular entry, kinetics of nuclear uptake and chromosomal association of fluorescently labelled RCfs. (A) NIH3T3 cells ( $10 \times 10^4$ ) were grown on cover-slips and treated with RCfs (10 ng DNA) dual-labelled with ULS (red) and ATTO-TEC (green) for 6 h and examined by LSCM. Presence of dual-labelled RCfs in the cytoplasm and nuclei are clearly seen. The red and green signals appear yellow in colour when the images are merged. (B) Kinetics of nuclear uptake of fluorescently labelled RCfs. NIH3T3 cells grown on cover-slips were treated with RCfs (10 ng DNA) and examined by LSCM at various time-points. Fifty nuclei were analysed at each time-point and those containing at least two fluorescent spots were counted as positive. (C) Association of fluorescently dual-labelled RCfs with chromosomes of treated cells. NIH3T3 cells were treated with RCfs (10 ng DNA) and metaphase spreads were prepared 6 h after treatment and analysed by fluorescence microscopy as described earlier.

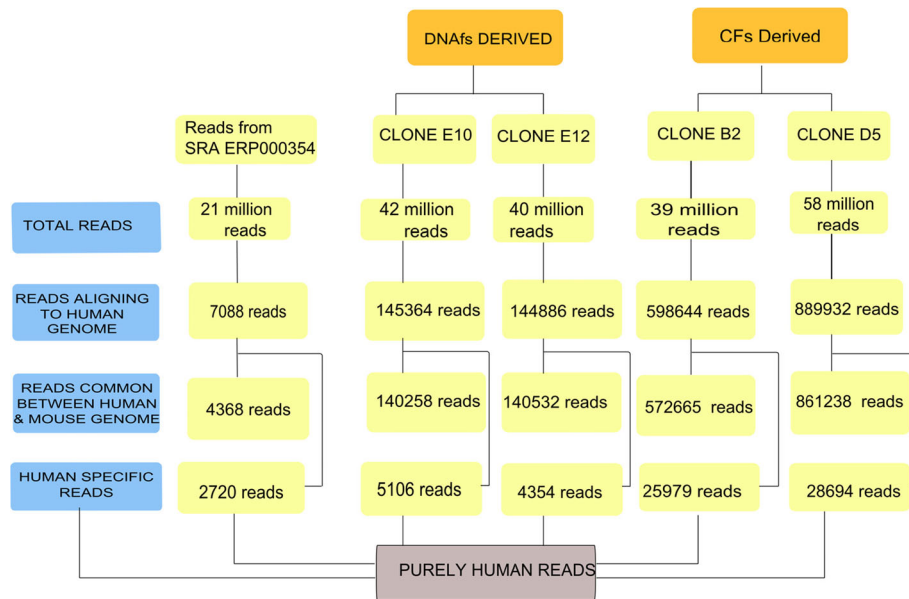

**Supplementary figure 5.** Summary results of strictly human-specific sequences detected in single-cell clones generated from DNAs (E10, E12) and Cfs (B2, D5) treated NIH3T3 cells as well as in mouse reference genome through whole genome sequencing analysis. The 2720 sequence reads in reference genome are either an artifact of inefficiency of our alignment algorithm, or an artifact of sequencing in the mouse reference genome. The sequences represented by these 2720 reads were annotated and subsequently, all genes represented by these sequences were removed from our downstream analysis.

|                        | Alu-J | Alu-Sx | Alu-Sq | Alu-Sc | Alu-Sp | Alu-FLA | Alu-Sb2 | Alu-Sqpx | Alu-Sb |
|------------------------|-------|--------|--------|--------|--------|---------|---------|----------|--------|
| Cfs-derived clone B2   | Red   | Red    | Red    | Red    | Red    | Red     | Red     | Red      | Red    |
| Cfs-derived clone D5   | Red   | Red    | Red    | Red    | Red    | Red     | Red     | Red      | Red    |
| DNAs-derived clone E10 | Red   | Red    | Red    | Red    | Red    | White   | White   | White    | White  |
| DNAs-derived clone E12 | Red   | Red    | Red    | Red    | Red    | White   | White   | White    | White  |
| Total                  | 39    | 28     | 27     | 13     | 9      | 3       | 3       | 1        | 1      |

**Supplementary figure 6.** Heat-map representation of *Alu* family members found in Cfs- and DNAs-derived clones: Distribution of all *Alu* elements with 80% and above sequence identity without gaps to the nucleotide sequences of all human *Alu* repeat elements database containing more than 1.1 million *Alu* repeats and 327 *Alu* family members is shown. Columns represent *Alu* family members found sorted in decreasing order from left to right by the last row that displays total number of *Alu* elements found for each family across all Cfs- and DNAs-derived clones – shown by rows. Red colour indicates presence of an *Alu* family member in the clone, white color indicates absence of *Alu* family member representation. Maximal occurrence of *Alu-Sx* and *Alu-J* family members (n=67 of 124 found across all clones) are known to be the most ancient and abundant *Alu* family constituting 850,000 repeats of 1.1 million in the human genome.

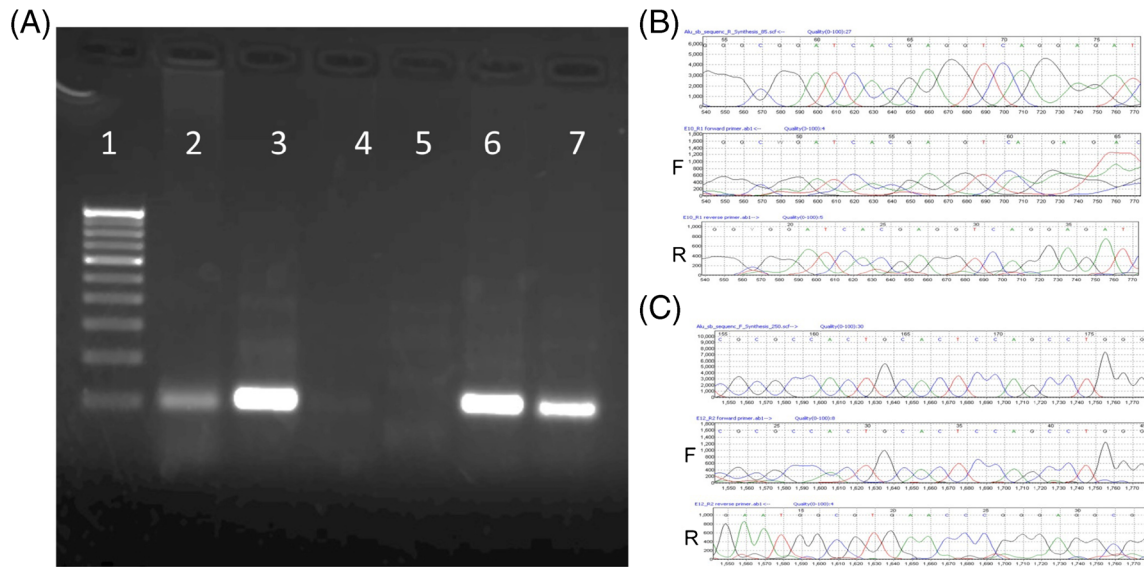

**Supplementary figure 7.** PCR detection and sequencing of human *Alu* elements in mouse clones derived from human Cfs and DNAs. Representative PCR amplification (A) and sequence trace (B and C) of *Alu-Sb* and *Alu-Sp*. (A) Lanes 2 and 3 correspond to PCR amplified *Alu-Sb* and *Alu-Sp* from D5 and E10 clones. Lanes 4 and 5 correspond to untreated NIH3T3 cells for amplification of *Alu-Sb* and *Alu-Sp*, respectively (negative control). Lanes 6 and 7 correspond to aliquots of a human cell DNA (positive control). (B and C) Sequence trace of amplified fragment *Alu-Sb* (B) and *Alu-Sp* (C) are displayed along with the reference human *Alu* sequence as generated by Mutation Surveyor.

(A)

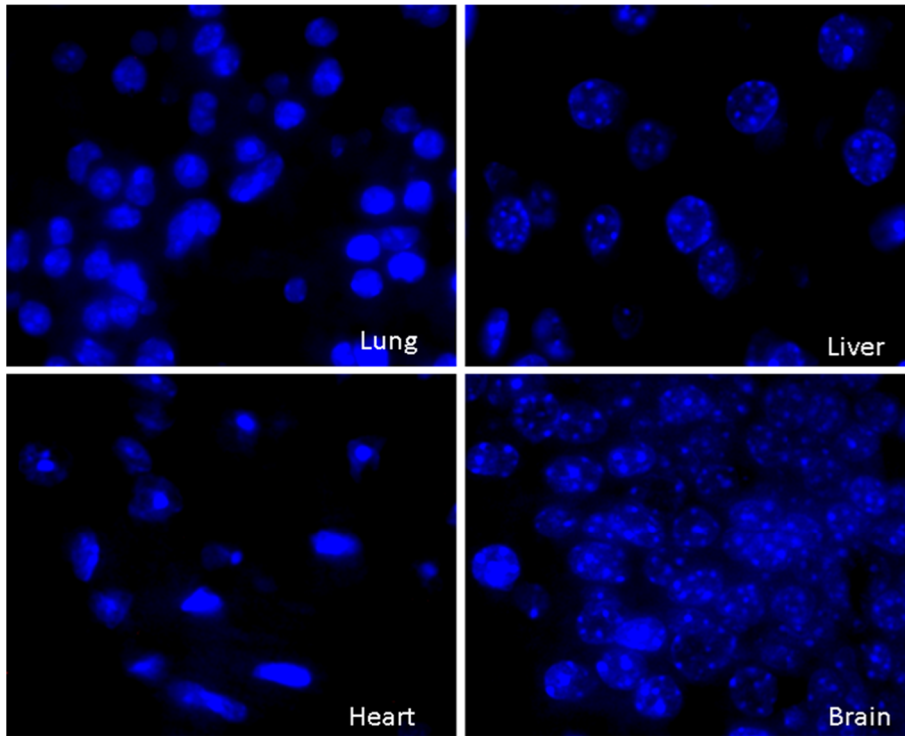

(B)

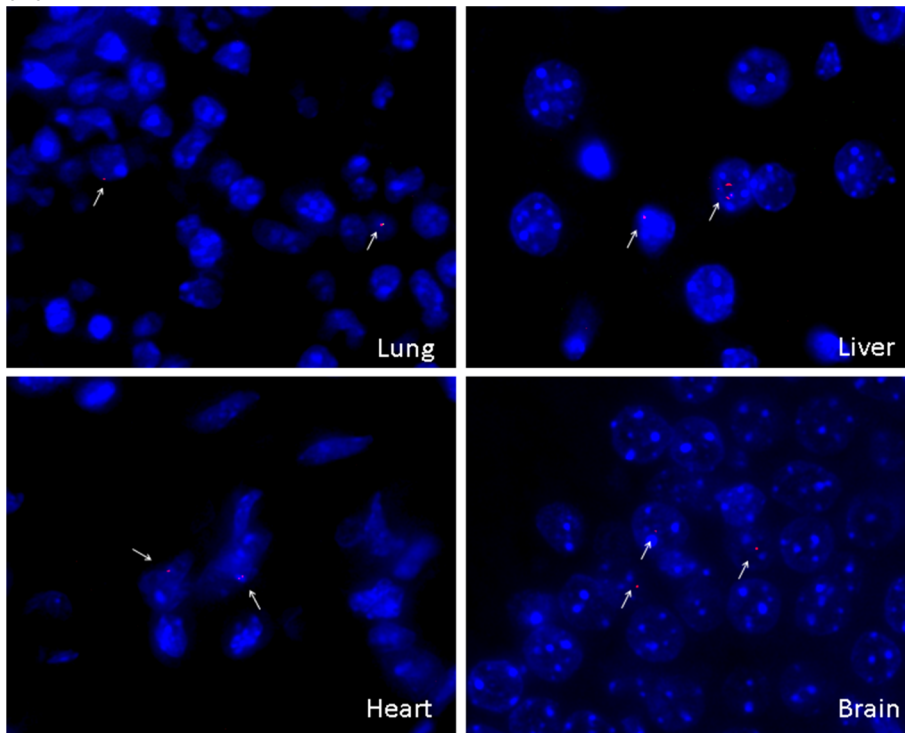

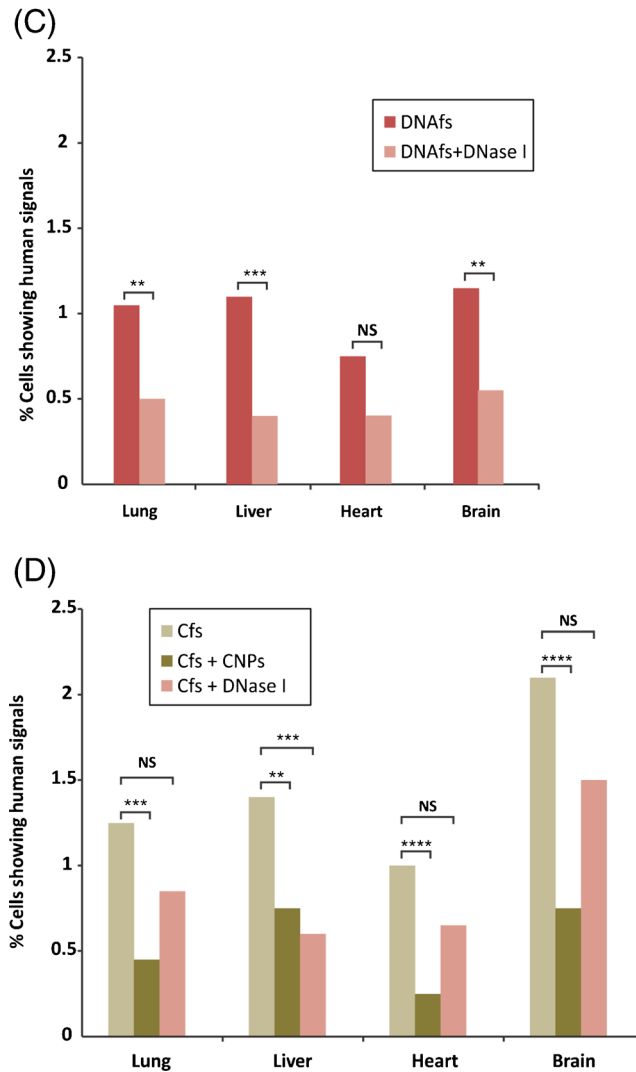

**Supplementary figure 8.** Detection of human DNA in cells of vital organs of mice by FISH following intravenous injections of DNafs and Cfs isolated from cancer patients. (A and B) Representative FISH images showing positive FISH signals in cells of vital organs of mice injected with Cfs (100 ng DNA) i.v. and sacrificed on day 7 (supplementary figure 8B). Untreated animals did not show any positive signals (supplementary figure 8A). (C and D) *In vivo* detection of human DNA by FISH in vital organs of mice following intravenous injection of DNafs and Cfs in presence or absence of DNase I and/or CNPs. Mice were given a single intravenous injection of DNafs and Cfs (100 ng DNA each) through tail vein with and without simultaneous administration of DNase I (15 mg/kg i.p.) and/or CNPs (50  $\mu$ g H4 IgG/mouse i.p.). DNase I and CNPs treatment was started 4 h prior to DNafs and Cfs administration and continued for 7 days. DNase I was injected at 12 hourly intervals while CNPs were administered every 24hr. Animals were sacrificed on day 7 and their vital organs, namely, heart, lung, liver and brain were removed and processed for FISH. The experiments were done in duplicate and with two animals in each group. Two thousand cells were counted for each tissue per animal and the percentage of nuclei showing human-specific signals (genomic and/or centromeric) was calculated and analysed by Chi-square test. Genomic integration of DNafs was inhibited by treatment with DNase I, while that of Cfs was inhibited by treatment with both DNase I and CNPs. \* $p$ <0.05, \*\* $p$ <0.01, \*\*\* $p$ <0.001, \*\*\*\* $p$ <0.0001.

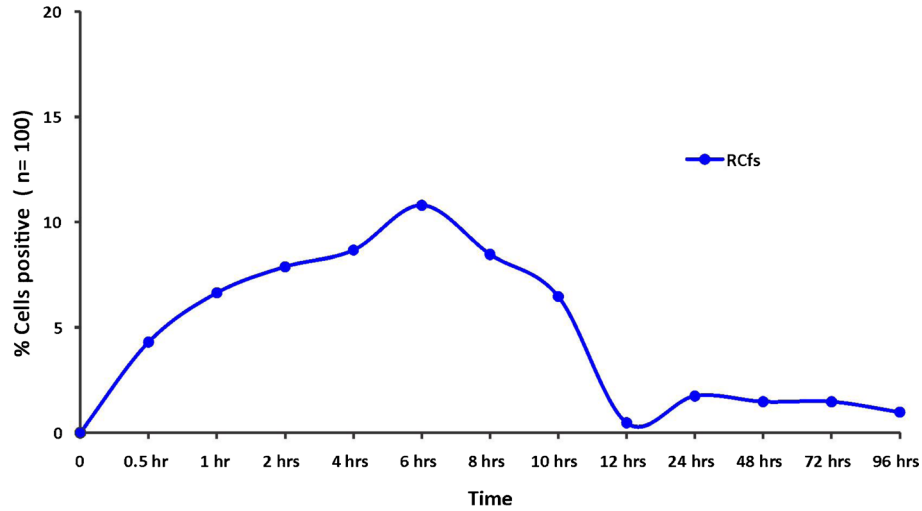

**Supplementary figure 9.** Kinetics of H<sub>2</sub>AX phosphorylation in NIH<sub>3</sub>T<sub>3</sub> cells treated with RCfs. NIH<sub>3</sub>T<sub>3</sub> cells ( $10 \times 10^4$ ) grown on cover-slips were treated with RCfs (10ng DNA) and cells processed for immunofluorescence to detect H<sub>2</sub>AX activation at various time points. Fifty nuclei in duplicate were analyzed at each time-point; those with two or more fluorescent foci were considered as positive.

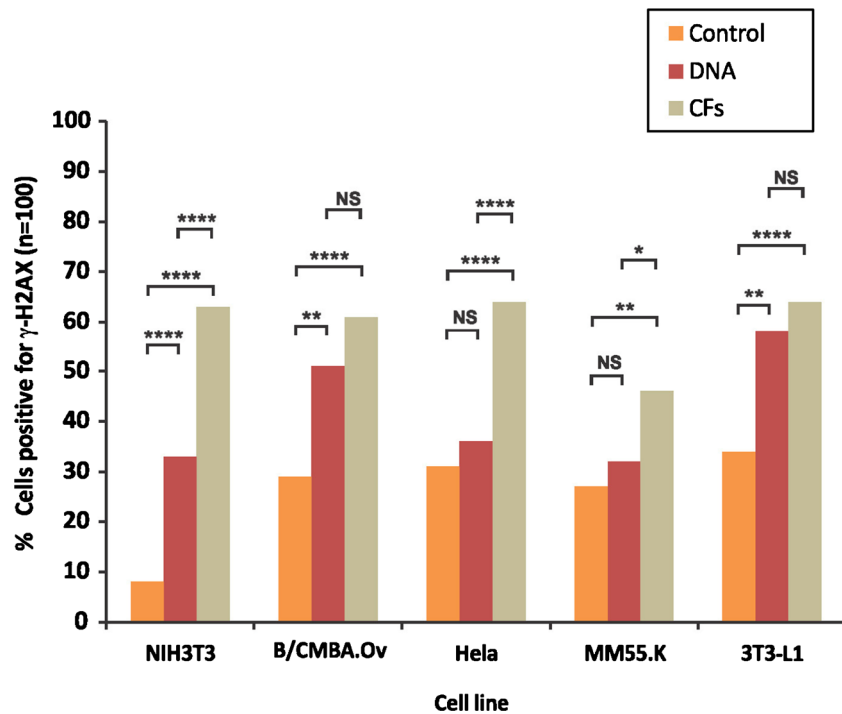

**Supplementary figure 10.** Induction of  $\gamma$ H<sub>2</sub>AX in different cell lines in response to DNAs and Cfs. Cells ( $10 \times 10^4$ ) grown on cover-slips were treated with DNAs and Cfs (5 ng DNA each) and cells were processed for immunofluorescence at 6 hours following treatment. Experiments were done in duplicate, 50 cells were counted in each case and the percentage of cells showing positive signals was recorded. Number of nuclei with two or more fluorescent foci were counted as positive and analysed by Chi-square test. \* $p < 0.05$ , \*\* $p < 0.01$ , \*\*\* $p < 0.001$ , \*\*\*\* $p < 0.0001$ . NIH3T3 = mouse fibroblast cells; B/CMBA.Ov = mouse ovary cells; HeLa = human cervical cancer; MM55.K = mouse kidney; 3T3-L1 = mouse adipocyte.

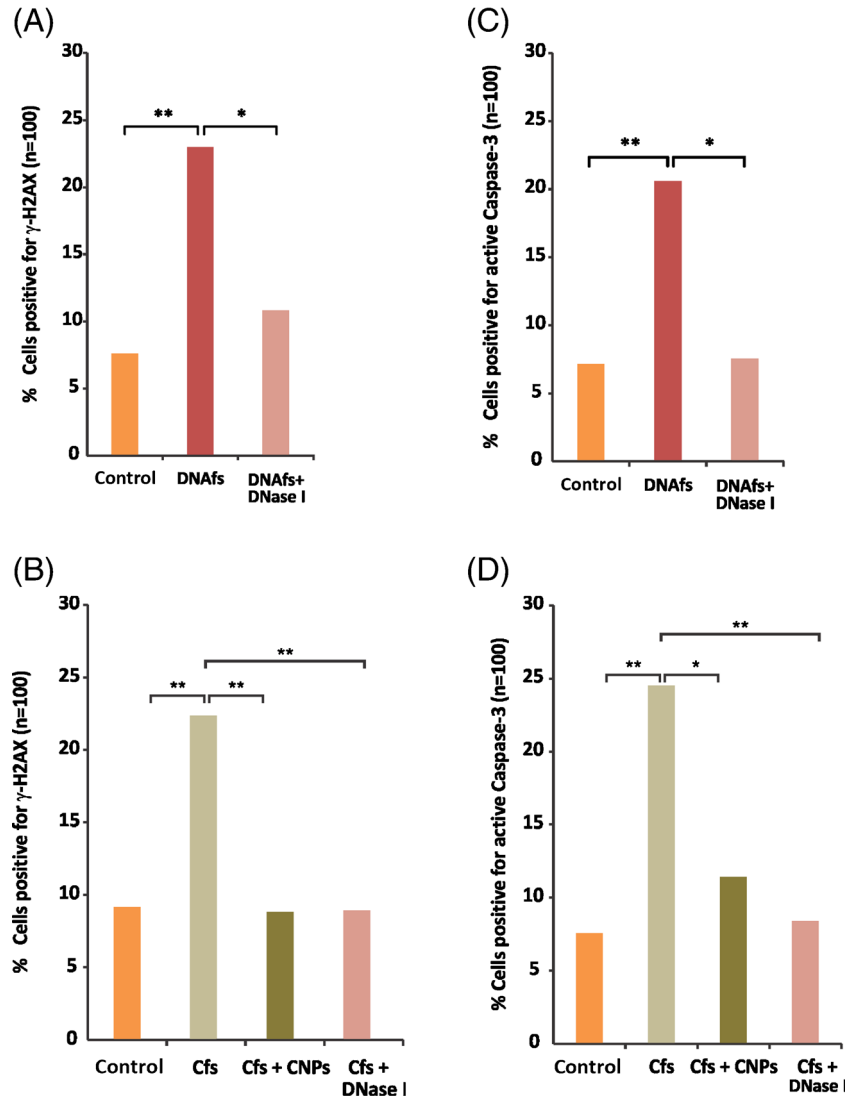

**Supplementary figure 11.** Inhibition of H2AX and Caspase-3 activation in response to DNafs and Cfs in NIH3T3 cells following treatment with DNase I and / or CNPs. NIH3T3 cells ( $10 \times 10^4$ ) grown on cover slips were treated with DNafs and Cfs (5 ng DNA each) in the presence or absence of DNase I (0.05 U/mL) and / or CNPs (5  $\mu$ g H4 IgG/mL). Cells were processed for immuno-fluorescence. Experiments were done in duplicate, 50 cells were counted in each case and the percentage of cells showing positive signals was recorded. Number of nuclei with two or more fluorescent foci were counted as positive and analysed by Chi-square test. (A–D) Both H2AX and Caspase-3 activation by DNafs was significantly inhibited by treatment with DNase I (A and C), while that by Cfs was significantly inhibited by treatment with both DNase I and CNPs (B and D). \* $p < 0.05$ , \*\* $p < 0.01$ , \*\*\* $p < 0.001$ , \*\*\*\* $p < 0.0001$ .

(A)

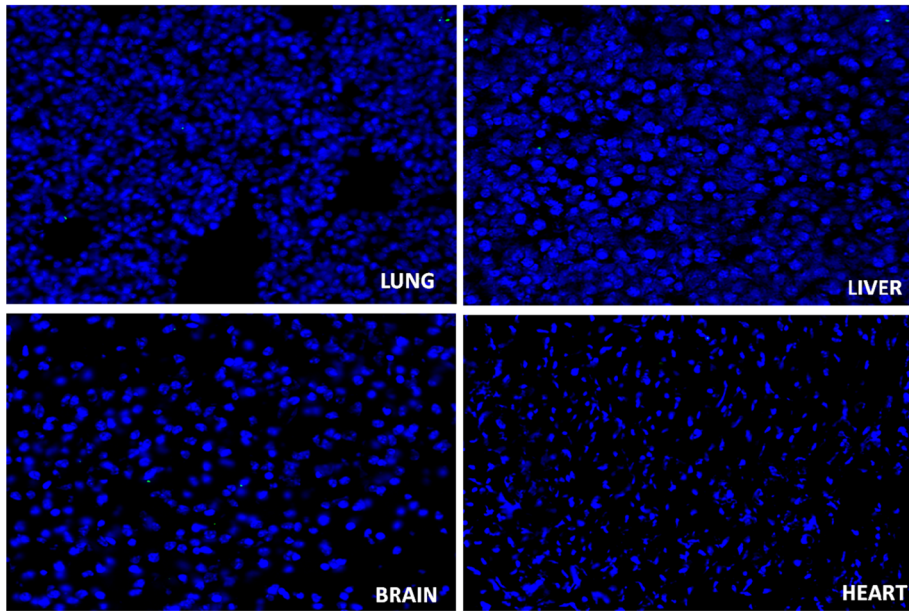

(B)

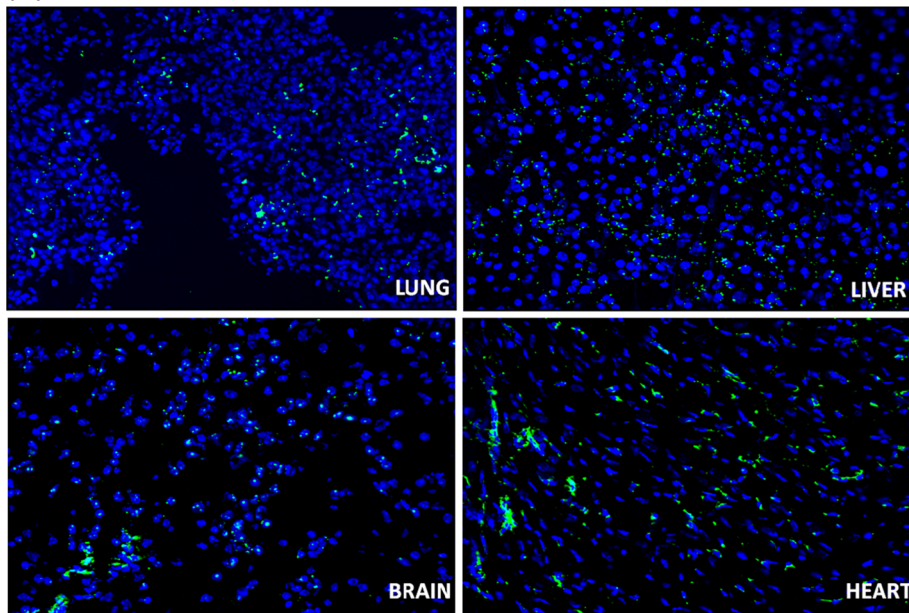



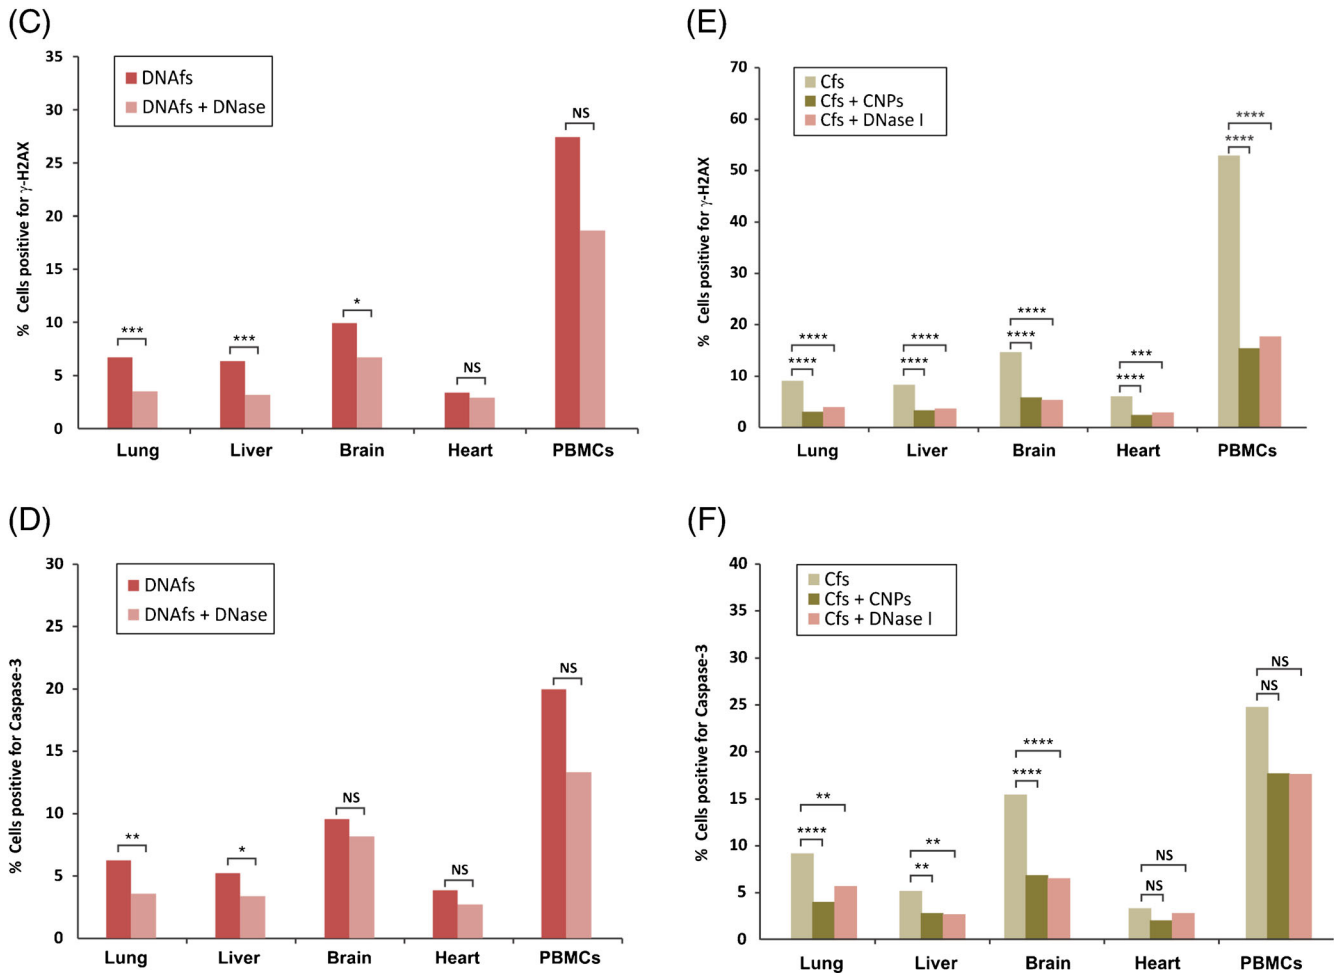

**Supplementary figure 12.** Activation of H2AX and Caspase-3 in vital organs of mice following intravenous injections of DNAFs and Cfs isolated from cancer patients. (A and B) Representative immune-fluorescence images showing  $\gamma$ -H2AX activation in vital organs of mice following i.v. injection of Cfs. Cfs (100 ng DNA) were injected i.v. and animals were sacrificed after 24 h. Vital organs removed and processed for H2AX activation by immunofluorescence as described earlier. Animals treated with vehicle only (A); animals treated with Cfs (B). (C and D) Inhibition by DNase I of H2AX and Caspase-3 activation following intravenous injections into mice of DNAFs. Animals were injected with DNAFs (100 ng DNA) through tail vein with and without simultaneous administration of DNase I (15 mg/kg i.p.). DNase I treatment was started 4 h prior to DNAFs administration and repeated at 12 hourly intervals. Animals were sacrificed after 24hr and their vital organs, namely, heart, lung, liver and brain were removed and processed for immunofluorescence. The experiments were done in duplicate and with two animals in each group. At least 1000 DAPI-stained nuclei per animal were examined from 10 randomly chosen areas of various tissues, and in case of PBMCs, 100 nuclei per animal were examined. In both cases, the number of nuclei showing positive foci ( $\gamma$ -H2AX) and number of nuclei showing positive fluorescence (Caspase-3) were recorded and analysed by Chi-square test. Both H2AX and Caspase-3 activation following DNAFs treatment were inhibited by concurrent treatment with DNase I. (E and F) Inhibition by DNase I and/or CNPs of H2AX and Caspase-3 activation following intravenous injections into mice of Cfs. Mice were given a single intravenous injection of Cfs (100 ng DNA) through tail vein with and without simultaneous administration of DNase I (15 mg/kg i.p.) and/or CNPs (50 $\mu$ g H4 IgG/mouse i.p.). DNase I and CNPs treatment was started 4 h prior to Cfs administration; DNase I was injected at 12 hourly intervals thereafter while CNPs were administered once 24 h after the first injection. Animals were sacrificed after 24 h and their vital organs, namely, heart, lung, liver and brain were removed and processed for immunofluorescence. The experiments were done in duplicate and with two animals in each group. At least 1000 DAPI-stained nuclei per animal were examined from 10 randomly chosen areas of various tissues, and in case of PBMCs, 100 nuclei per animal were examined. In both cases, the number of nuclei showing positive foci ( $\gamma$ -H2AX) and number of nuclei showing positive fluorescence (Caspase-3) were recorded and analysed by Chi-square test. H2AX and Caspase-3 activation following Cfs treatment were inhibited by treatment with both DNase I and CNPs. \* $p$ <0.05, \*\* $p$ <0.01, \*\*\* $p$ <0.001, \*\*\*\* $p$ <0.0001.

**Supplementary table 1.** Details of cancer patients

| Sr. No. | Age | Sex | Type of cancer            | Stage     |
|---------|-----|-----|---------------------------|-----------|
| 1       | 68  | M   | Ca-Oesophagus             | III       |
| 2       | 36  | F   | Ca-Breast                 | III       |
| 3       | 40  | F   | Ca-Breast                 | III       |
| 4       | 47  | F   | Ca-Breast                 | III       |
| 5       | 46  | F   | Ca-Breast                 | III       |
| 6       | 45  | F   | Ca-Breast                 | IV        |
| 7       | 48  | F   | Ca-Breast                 | III       |
| 8       | 48  | F   | Ca-Breast                 | III       |
| 9       | 53  | F   | Ca-Breast                 | III       |
| 10      | 33  | M   | Acute myeloid leukemia-M2 | Poor risk |
| 11      | 54  | M   | Ca-Supraglottis           | III       |
| 12      | 58  | F   | Ca-Breast                 | III       |
| 13      | 50  | F   | Ca-Breast                 | III       |
| 14      | 60  | M   | Ca-Esophagus              | III       |
| 15      | 54  | M   | Acute myeloid leukemia-M2 | Poor risk |
| 16      | 53  | M   | Ca-Hypopharynx            | III       |
| 17      | 44  | M   | Carcinoid Tumour          | III       |
| 18      | 53  | F   | Acute myeloid leukemia-M4 | Good risk |
| 19      | 47  | M   | Ca-Lung                   | IV        |
| 20      | 47  | F   | Ca-Breast                 | III       |
| 21      | 25  | M   | Acute myeloid leukemia-M0 | Poor risk |
| 22      | 46  | F   | Ca-Breast                 | III       |
| 23      | 45  | F   | Ca-Breast                 | III       |
| 24      | 50  | F   | Ca-Breast                 | III       |
| 25      | 47  | F   | Ca-Breast                 | III       |
| 26      | 53  | F   | Ca-Breast                 | III       |
| 27      | 49  | F   | Ca-Breast                 | III       |
| 28      | 56  | F   | Ca-Oesophagus             | III       |
| 29      | 48  | F   | Ca-Breast                 | III       |
| 30      | 44  | F   | Ca-Breast                 | III       |
| 31      | 54  | M   | Ca-Lung                   | III       |
| 32      | 49  | F   | Ca-Breast                 | III       |
| 33      | 36  | F   | Ca-Breast                 | III       |
| 34      | 56  | F   | Ca-Breast                 | III       |
| 35      | 48  | F   | Ca-Breast                 | III       |
| 36      | 72  | F   | Ca-Breast                 | III       |
| 37      | 46  | F   | Ca-Breast                 | III       |
| 38      | 37  | F   | Ca-Breast                 | III       |
| 39      | 43  | F   | Ca-Breast                 | III       |
| 40      | 56  | F   | Ca-Breast                 | III       |
| 41      | 59  | F   | Ca-Breast                 | III       |
| 42      | 72  | F   | Ca-Oesophagus             | III       |
| 43      | 53  | M   | Ca-Buccal Mucosa          | IV        |
| 44      | 49  | F   | Ca-Breast                 | III       |
| 45      | 51  | F   | Ca-Ovary                  | III       |
| 46      | 17  | F   | Acute myeloid leukemia-M4 | Good risk |

| Sr. No. | Age | Sex | Type of cancer            | Stage     |
|---------|-----|-----|---------------------------|-----------|
| 47      | 38  | F   | Acute myeloid leukemia-M2 | Good risk |
| 48      | 48  | F   | Ca-Breast                 | III       |
| 49      | 30  | F   | Ca-Breast                 | III       |
| 50      | 59  | M   | Ca-Oesophagus             | III       |
| 51      | 47  | F   | Ca-Ovary                  | III       |
| 52      | 34  | M   | Ca-Stomach                | IV        |
| 53      | 54  | F   | Ca-Ovary                  | III       |
| 54      | 41  | F   | Ca-Stomach                | IV        |
| 55      | 50  | F   | Ca-Ovary                  | III       |
| 56      | 40  | M   | Ca-Buccal Mucosa          | IV        |
| 57      | 62  | F   | Ca-Oesophagus             | III       |
| 58      | 56  | M   | Ca-Gingivo-Buccal Sulcus  | III       |
| 59      | 62  | M   | Ca- Gingivo-Buccal Sulcus | III       |
| 60      | 55  | M   | Hodgkin's Lymphoma        | IV        |
| 61      | 46  | F   | Ca-Breast                 | III       |
| 62      | 32  | F   | Ca-Breast                 | III       |
| 63      | 57  | F   | Ca-Breast                 | III       |
| 64      | 50  | F   | Ca-Breast                 | III       |
| 65      | 50  | F   | Ca-Breast                 | III       |
| 66      | 42  | F   | Ca-Breast                 | III       |

Mean age =  $48.15 \pm 9.70$  (mean  $\pm$  SD)

#### Details of healthy volunteers

| Sr. No. | Age | Sex |
|---------|-----|-----|
| 1       | 52  | F   |
| 2       | 50  | F   |
| 3       | 50  | F   |
| 4       | 51  | F   |
| 5       | 52  | F   |
| 6       | 42  | F   |

Mean age =  $49.50 \pm 3.78$  (mean  $\pm$  SD)

**Supplementary table 2.** Summary of sequencing reads generated from Cfs-derived and DNAFs-derived clones using second-generation sequencing platform (we achieved a mean sequencing coverage of 1.2x across the four clones)

| Clone             | Sequence File | Read length | No of Sequences | No of Bases   | Coverage |
|-------------------|---------------|-------------|-----------------|---------------|----------|
| E10 DNAFs-derived | E10 Forward   | 100         | 21,379,060      | 2,137,906,000 | 1.57     |
|                   | E10 Reverse   | 100         | 21,379,060      | 2,137,906,000 |          |
|                   | Total         |             | 42,758,120      | 4,275,812,000 |          |
| E12 DNAFs-derived | E12 Forward   | 100         | 20,153,181      | 2,015,318,100 | 1.48     |
|                   | E12 Reverse   | 100         | 20,153,181      | 2,015,318,100 |          |
|                   | Total         |             | 40,306,362      | 4,030,636,200 |          |
| B2 Cfs-derived    | B2 Forward    | 54          | 19,571,148      | 1,056,841,992 | 0.77     |
|                   | B2 Reverse    | 54          | 19,571,148      | 1,056,841,992 |          |
|                   | Total         |             | 39,142,296      | 2,113,683,984 |          |
| D5 Cfs-derived    | D5 Forward    | 54          | 29,094,305      | 1,571,092,470 | 1.15     |
|                   | D5 Reverse    | 54          | 29,094,305      | 1,571,092,470 |          |
|                   | Total         |             | 58,188,610      | 3,142,184,940 |          |

**Supplementary Table 3.** List of DDR and apoptotic pathway antibodies and their sources

| Antibody                  | Source                             | Catalogue No. |
|---------------------------|------------------------------------|---------------|
| (p-Ser139) $\gamma$ -H2AX | Abcam®, UK                         | Ab26350       |
| (p-Ser 428)-ATR           | Abcam®, UK                         | Ab2905        |
| (p-Ser1981) ATM           | Abcam®, UK                         | Ab2888        |
| MDC-1                     | Abcam®, UK                         | Ab11169       |
| (p-Ser 20) p-p53          | Santa Cruz Biotechnology Inc., USA | SC18078-R     |
| (pThr145) p-p21           | Santa Cruz Biotechnology Inc., USA | SC-20220-R    |
| GADD34                    | Abcam®, UK                         | Ab9869        |
| Nibrin                    | Santa Cruz Biotechnology Inc., USA | SC11431       |
| Rad50                     | Santa Cruz Biotechnology Inc., USA | SC7675        |
| Mre11                     | Cell Signalling Technology®, USA   | #4895         |
| (p-Ser 2056) DNA-PKcs     | Abcam®, UK                         | Ab32566       |
| DNA ligase IV             | Abcam®, UK                         | Ab80514       |
| Cytochrome-C              | Millipore, USA                     | 05-479        |
| active Caspase-3          | Abcam®, UK                         | Ab4051        |

**Supplementary table 4.** Tabulation of human *Alu* elements detected in Cfs and DNAFs-derived NIH3T3 clones

| Clones            | Total <i>Alu</i> sequences | Unique <i>Alu</i> families |
|-------------------|----------------------------|----------------------------|
| Cfs-derived B2    | 47                         | 8                          |
| Cfs-derived D5    | 35                         | 8                          |
| DNAFs-derived E10 | 19                         | 5                          |
| DNAFs-derived E12 | 23                         | 5                          |

Unique *Alu* families represent the families of the *Alu* sequences detected in the clones. The total *Alu*sequences found in the Cfs and DNAFs derived clones were depleted by the reads found in the control.
